# Supplementary material for: An In-Depth Study of Metabolite Profile and Biological Potential of Tanacetum balsamita L. (Costmary)
Source: Plants (Basel). 2022 Dec 20;12(1):22. doi: 10.3390/plants12010022 (PMC9824382; doi:10.3390/plants12010022)
Supplement: Supplementary file 1 [file plants-12-00022-s001.zip › Table S3_correlation enzyme inhibition.xlsx]

## Sheet: correlation enzyme(1)
	Tb1	Tb2	Tb3	Tb4	Tb5	Tb6	Tb7	Tb8	Tb9	Tb10	Tb11	Tb12	Tb13	Tb14	Tb15	Tb16	Tb17	Tb18	Tb19	Tb20	Tb21	Tb22	Tb23	Tb24	Tb25	Tb26	Tb27	Tb28	Tb29	Tb30	Tb31	Tb32	Tb33	Tb34	Tb35	Tb36	Tb37	Tb38	Tb39	Tb40	Tb41	Tb42	Tb43	Tb44	Tb45	Tb46	Tb47	Tb48	Tb49
AChE	-0.441875	0.805227	0.90361	-0.0750599	0.89466	-0.830451	-0.162844	-0.496813	-0.787006	-0.205351	-0.107221	0.90691	0.871726	-0.0901044	-0.792062	0.916582	0.805227	-0.185187	0.850804	-0.113128	-0.131087	-0.577919	-0.619182	-0.300181	0.989082	0.805227	0.907762	-0.606027	-0.115304	0.805227	0.805227	-0.509402	0.400222	-0.120049	-0.307616	-0.157297	0.0978854	-0.21881	-0.0154325	-0.0392031	-0.0380867	0.896398	-0.113426	-0.264961	-0.801573	-0.907203	-0.164762	-0.912118	0.847814
BChE	-0.388631	0.838542	0.876999	-0.0165865	0.866988	-0.796433	-0.104836	-0.54674	-0.821755	-0.147736	-0.048865	0.880704	0.841563	-0.0316782	-0.826422	0.891617	0.838542	-0.127372	0.8186	-0.0548001	-0.188868	-0.624679	-0.664066	-0.243855	0.99601	0.838542	0.881662	-0.65153	-0.0569868	0.838542	0.838542	-0.45818	0.453156	-0.061757	-0.251416	-0.0992462	0.0394888	-0.161344	0.0430968	0.0193289	0.020446	0.868928	-0.0550992	-0.320926	-0.835182	-0.881034	-0.106769	-0.886571	0.815334
Tyrosinase	-0.493959	0.768894	0.927277	-0.133678	0.919426	-0.86183	-0.22069	-0.44482	-0.749291	-0.262654	-0.16561	0.930157	0.89908	-0.148623	-0.754722	0.938547	0.768894	-0.242761	0.880285	-0.171468	-0.0724531	-0.528835	-0.571843	-0.355857	0.978682	0.768894	0.930899	-0.55811	-0.173626	0.768894	0.768894	-0.559215	0.345536	-0.17833	-0.36314	-0.215205	0.156347	-0.275918	-0.0743135	-0.0980046	-0.0968926	0.920955	-0.171763	-0.207691	-0.764955	-0.930412	-0.222585	-0.934685	0.877583
Amylase	-0.743834	0.526908	0.998105	-0.440567	0.996638	-0.978077	-0.518138	-0.138377	-0.501075	-0.554633	-0.469326	0.998553	0.991434	-0.454069	-0.508188	0.999543	0.526908	-0.537409	0.985213	-0.474566	0.24705	-0.232918	-0.282693	-0.633433	0.863311	0.526908	0.99866	-0.266689	-0.476493	0.526908	0.526908	-0.792922	0.0306544	-0.480688	-0.639453	-0.513324	0.461018	-0.566041	-0.386223	-0.408046	-0.407026	0.99695	-0.474829	0.112697	-0.521682	-0.99859	-0.519799	-0.999148	0.984227
Glucosidase	-0.549625	-0.919155	-0.0884046	-0.821748	-0.0680146	-0.0596507	-0.768204	0.999936	0.9306	-0.739805	-0.802918	-0.096139	-0.0191097	-0.813053	0.927553	-0.119557	-0.919155	-0.753481	0.0220881	-0.799362	0.921167	0.996391	0.990697	-0.67038	-0.628089	-0.919155	-0.0981555	0.992825	-0.798044	-0.919155	-0.919155	-0.483906	-0.992876	-0.795155	-0.664569	-0.771789	0.808478	-0.730469	-0.854283	-0.841682	-0.842284	-0.0719098	-0.799182	0.965607	0.921556	0.0968322	-0.766958	0.108604	0.0277503
Lipase	-0.985802	-0.00833921	0.876754	-0.851861	0.886407	-0.93816	-0.894794	0.411843	0.0384478	-0.913262	-0.86833	0.872992	0.907998	-0.859671	0.0302133	0.861262	-0.00833921	-0.904693	0.924485	-0.871262	0.726306	0.32236	0.27318	-0.948757	0.460445	-0.00833921	0.872002	0.289153	-0.872335	-0.00833921	-0.00833921	-0.995779	-0.507808	-0.874662	-0.951195	-0.892271	0.863637	-0.918786	-0.819095	-0.832503	-0.831884	0.884593	-0.871409	0.625861	0.0144761	-0.872652	-0.89566	-0.866812	0.926629
[truncated: 54 more columns]
